# Supplementary material
Source: ML conference proceedings conference paper supplement (https://openaccess.thecvf.com/content/WACV2026/html/Tang_Spacewalk-18_A_Benchmark_WACV_2026_paper.html)
Supplement: Supplementary file 1 [file README.pdf › 00614_supp/README.pdf]

# Spacewalk-18: A Benchmark for Multimodal and Long-form Procedural Video Understanding in Novel Domains (Supplementary Material)

---

In the supplementary material, we provide an appendix ([appendix.pdf](#)) and a few videos demonstrating our annotations and tasks.

[videos/annotations.mp4](#) illustrates our annotated steps in the spacewalk mission on Feb. 28, 2021. For each step, we first show its animation video, caption, and transcript. Then we show one or two spacewalk video clips that correspond to the step.

In [videos/Task1-StepRecognition](#), we provide the videos used as the qualitative examples for the step recognition task in Appendix D.4. Due to the size limit of the supplementary material, we only show the videos for Figure A12, A13, A14, and A15.

In [videos/Task2-QuestionAnswering](#), we provide the videos used as the qualitative examples for the question answering task in Appendix D.4, including Figure A18, A19, and A20. Because the original query video for each question is 1-hour-long, we only show a few 1-minute-long segments to depict the key events.
